# Supplementary material for: Electric potential-determined redox intermediates for effective recycling of spent lithium-ion batteries
Source: Royal Society of Chemistry journal article supplement (doi:10.1039/d2gc00331g), 2022-01-01
Supplement: d2gc00331g1.pdf [file d2gc00331g1.pdf]

**Electric potential-determined redox intermediates for effective  
recycling of spent lithium-ion batteries**

Yunhui Hua<sup>a,b#</sup>, Zhenghe Xu<sup>c</sup>, Baojun Zhao<sup>b,d</sup> and Zuotai Zhang<sup>a\*</sup>

a. School of Environmental Science and Engineering, Southern  
University of Science and Technology (SUSTech), Shenzhen 518055,  
China.

b. School of Chemical Engineering, The University of Queensland, St  
Lucia 4072, Brisbane, Australia.

c. Department of Materials Science and Engineering, Southern  
University of Science and Technology (SUSTech), Shenzhen 518055,  
China.

d. Faculty of Materials, Metallurgy and Chemistry, Jiangxi University of  
Science and Technology, Ganzhou 341000, China.

\*Corresponding Author:

Prof. Zuotai Zhang, E-mail address: [zhangzt@sustech.edu.cn](mailto:zhangzt@sustech.edu.cn)

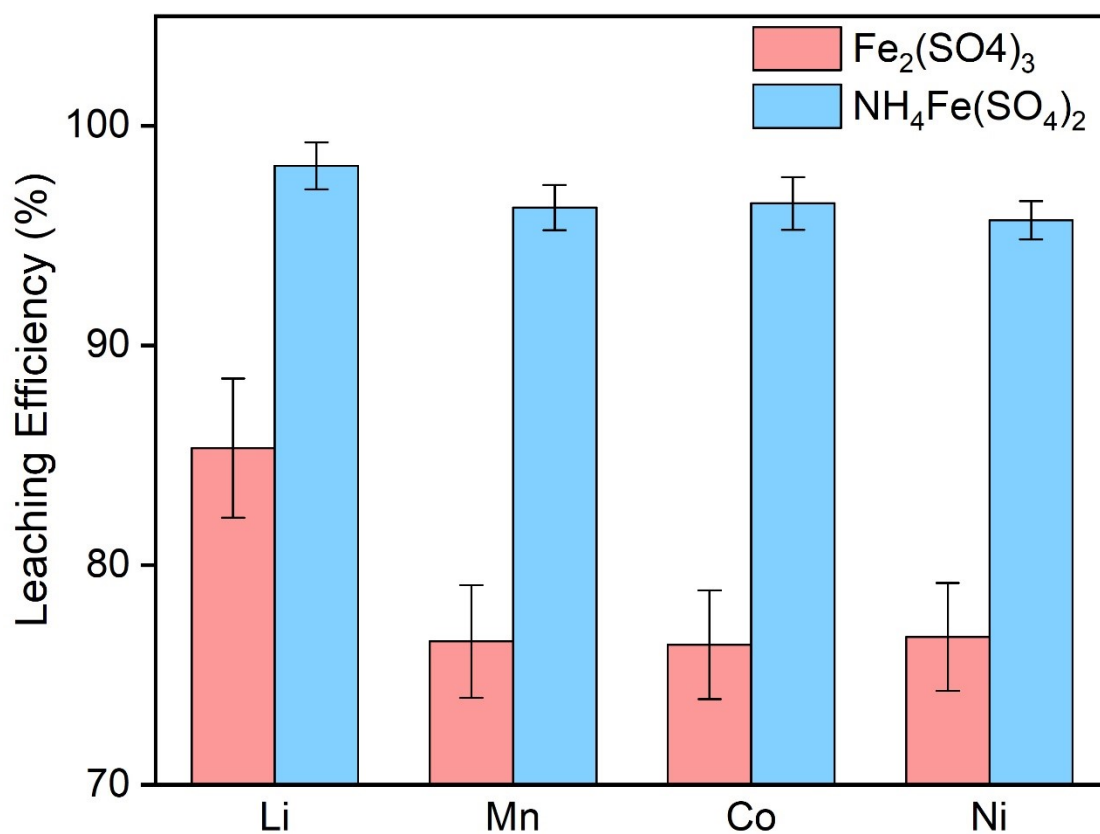

Fig. S1 Behaviors of synergistic metal leaching from NCM622 and LFP cathode by  $\text{Fe}_2(\text{SO}_4)_3$  and  $\text{NH}_4\text{Fe}(\text{SO}_4)_2$  (LFP/NCM622=1.8;  $\text{NH}_4\text{Fe}(\text{SO}_4)_2 \cdot 12\text{H}_2\text{O}$ /mixed cathode powder = 3:1, or  $\text{Fe}_2(\text{SO}_4)_3$ /mixed powder=1.1:1 (all in g/g) at 50°C for 30 min)

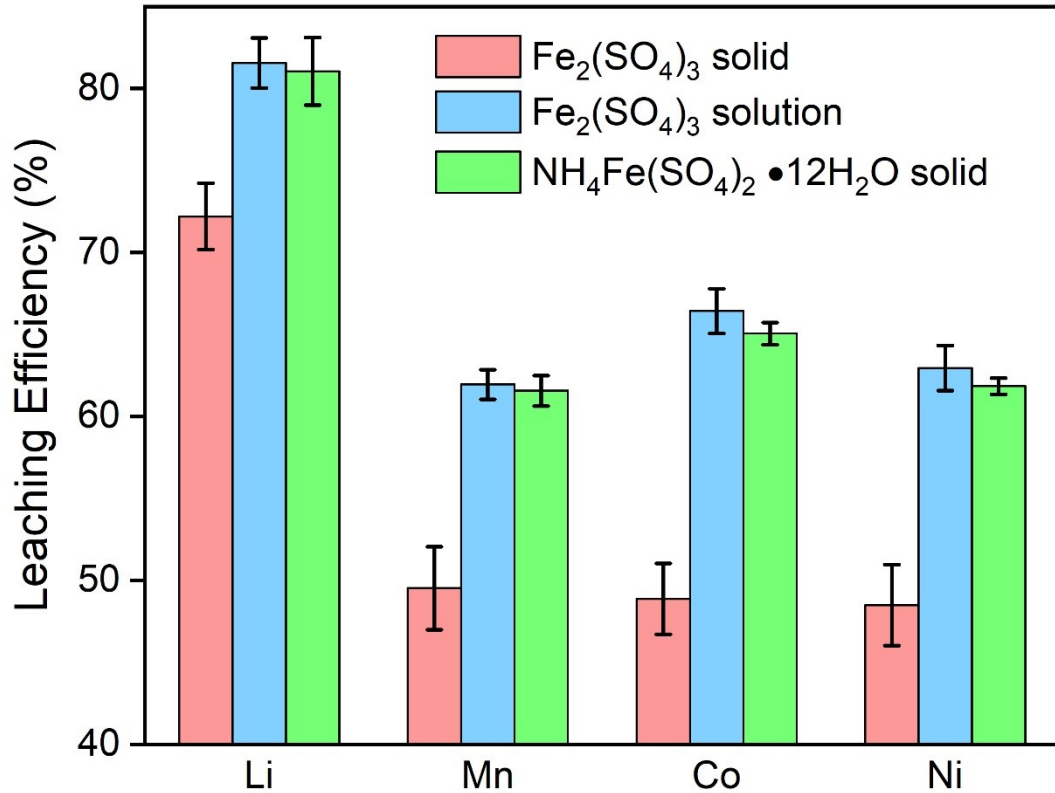

Fig. S2 Comparison of leaching efficiency by adding water with Fe<sub>2</sub>(SO<sub>4</sub>)<sub>3</sub> as solid powder and by preparing Fe<sub>2</sub>(SO<sub>4</sub>)<sub>3</sub> aqueous solution in advance, NH<sub>4</sub>Fe(SO<sub>4</sub>)<sub>2</sub>·12H<sub>2</sub>O also added for comparison (LFP/NCM622=1.8, Fe<sub>2</sub>(SO<sub>4</sub>)<sub>3</sub>/mixed powder=1.2:1, NH<sub>4</sub>Fe(SO<sub>4</sub>)<sub>2</sub>·12H<sub>2</sub>O/mixed cathode powder = 3:1 (all in g/g) at 50°C for 10 min)

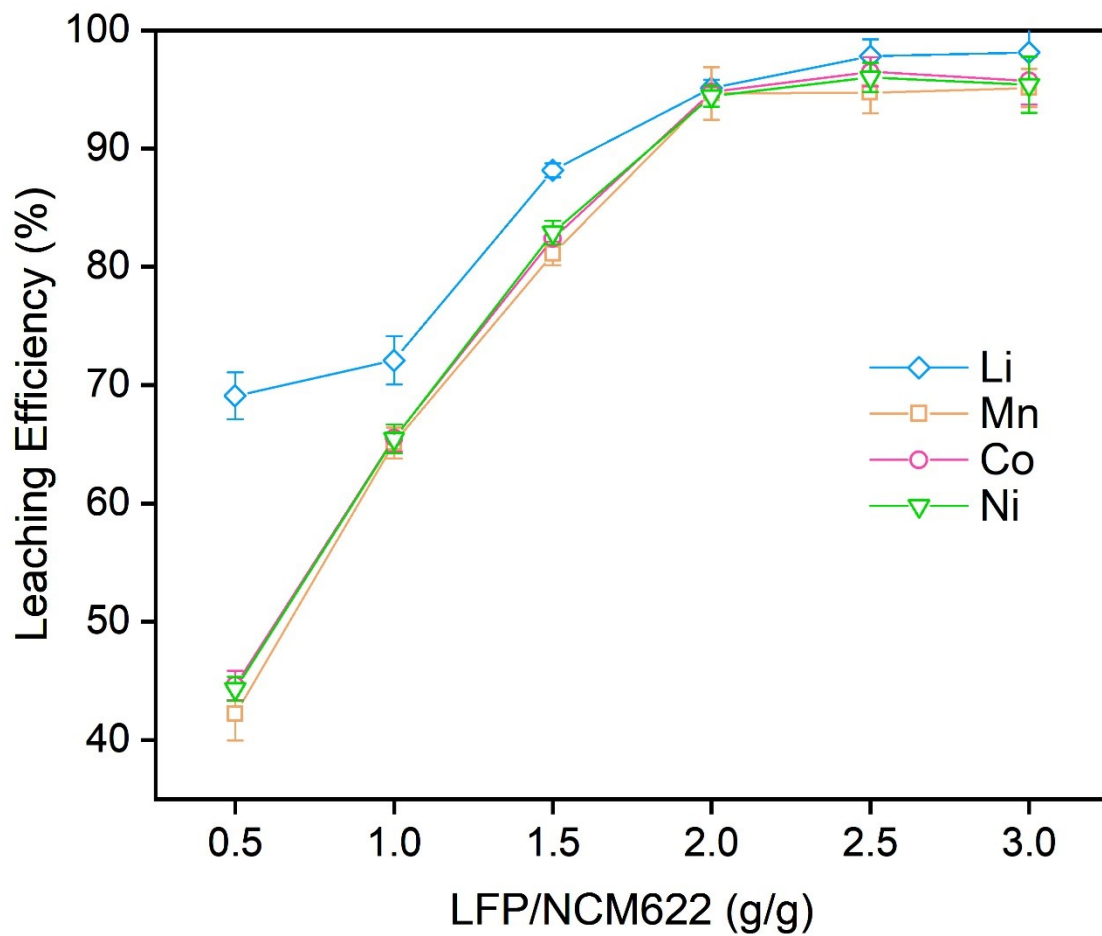

Fig. S3 Leaching efficiencies of metals under different LFP/NCM622 mass ratios

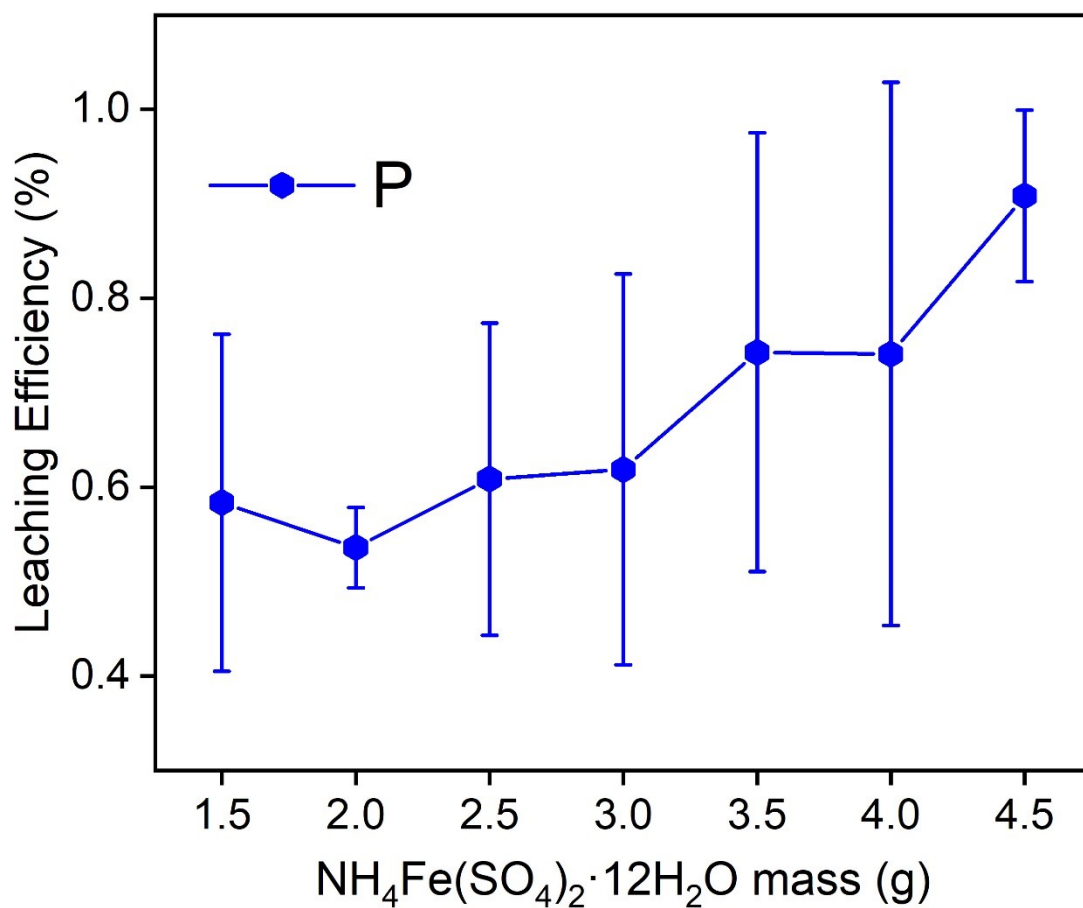

Fig. S4 Leaching efficiencies of phosphate with different added amount of  $\text{NH}_4\text{Fe}(\text{SO}_4)_2 \cdot 12\text{H}_2\text{O}$ . The phosphate was hardly extracted at all time.

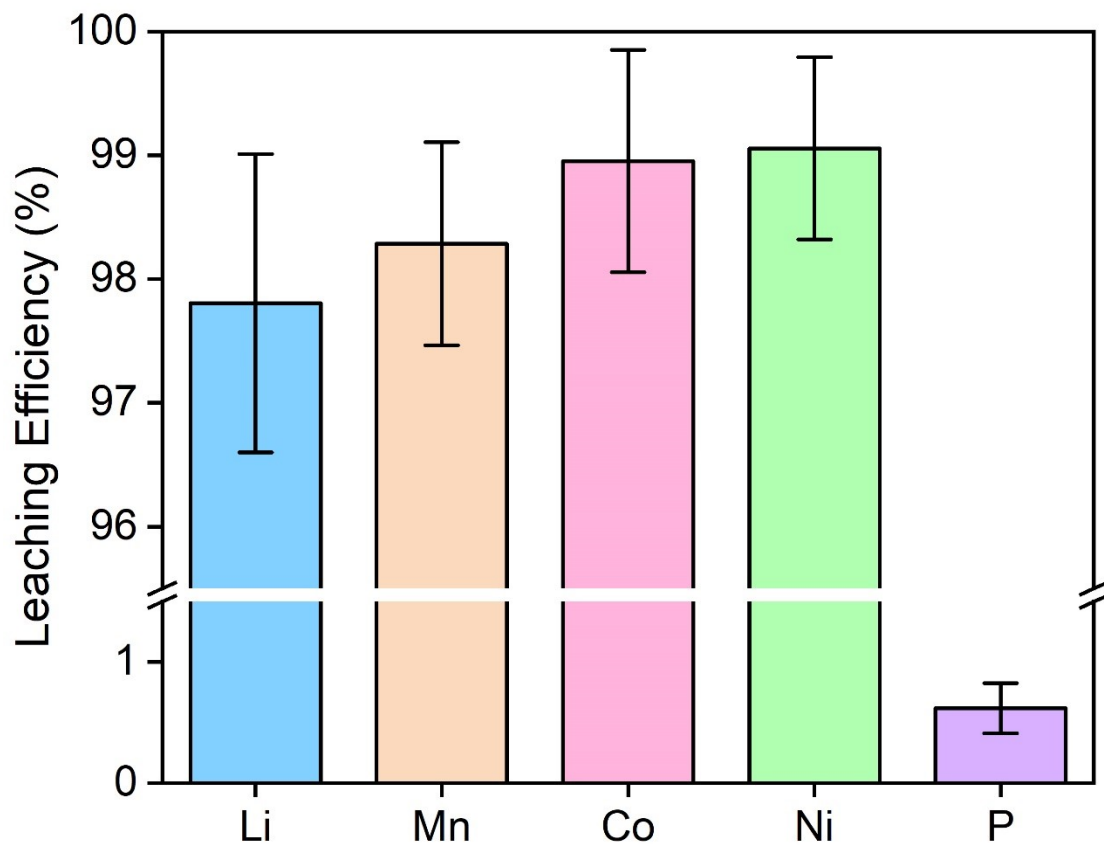

Fig. S5, Leaching efficiencies of Li, Mn, Co, Ni and P under optimized condition (LFP/NCM622=1.8 (g/g),  $\text{NH}_4\text{Fe}(\text{SO}_4)_2 \cdot 12\text{H}_2\text{O}$ /mixed cathode powder =3:1 (g/g), 50g/L, 50°C, 30min).

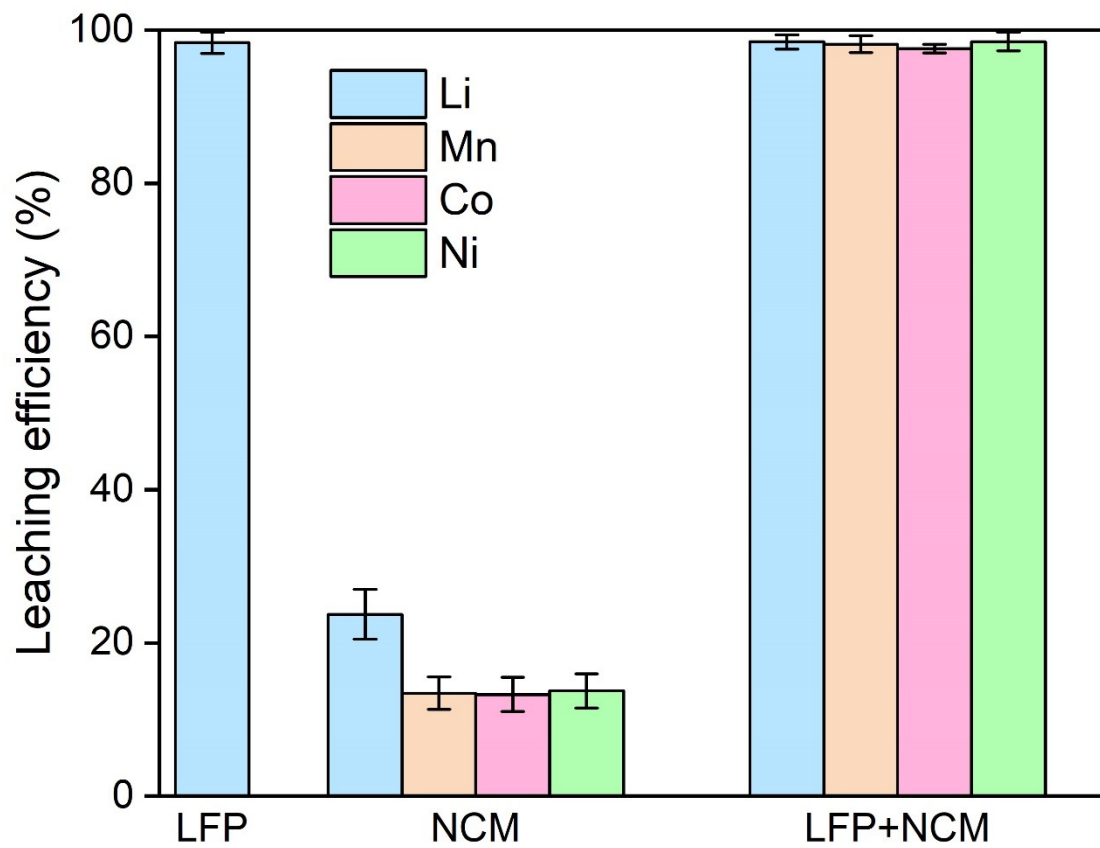

Fig. S6 Comparison of leaching effects using  $\text{NH}_4\text{Fe}(\text{SO}_4)_2 \cdot 12\text{H}_2\text{O}$  + LFP alone,  $\text{NH}_4\text{Fe}(\text{SO}_4)_2 \cdot 12\text{H}_2\text{O}$  + NCM alone, and  $\text{NH}_4\text{Fe}(\text{SO}_4)_2 \cdot 12\text{H}_2\text{O}$  + mixed powder.

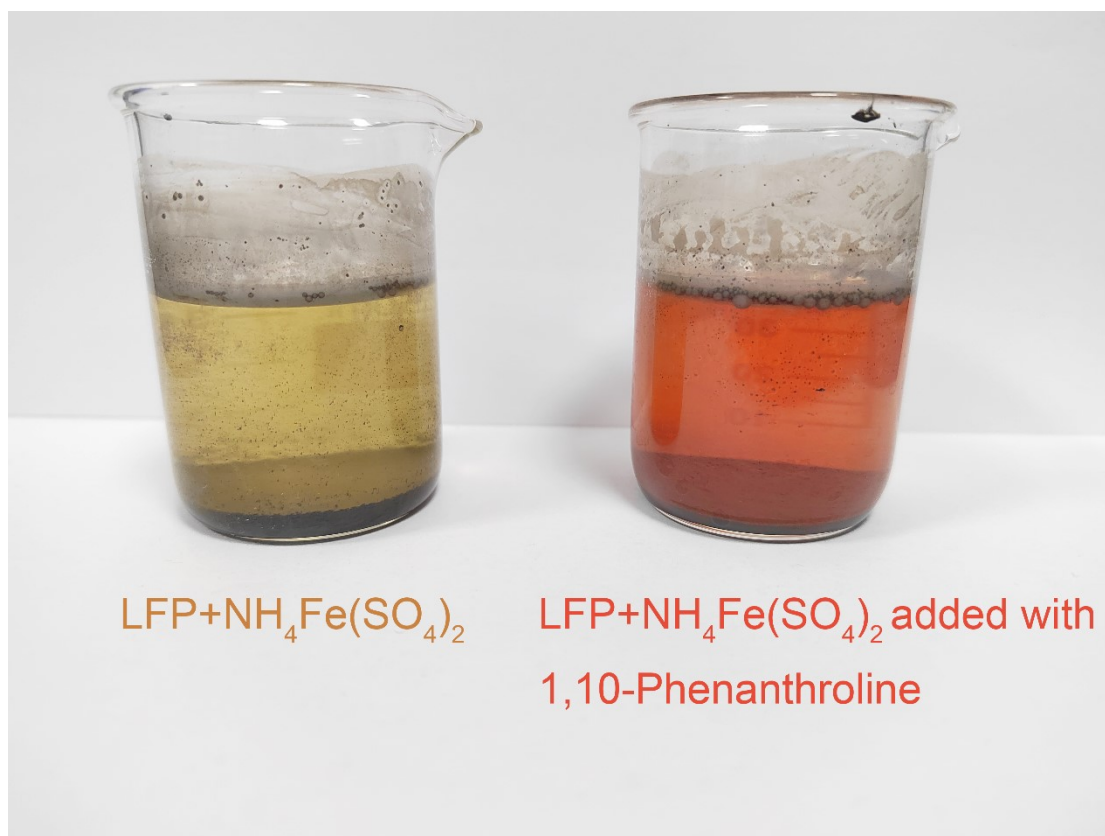

Fig. S7 Solution after reaction between LFP and  $\text{NH}_4\text{Fe}(\text{SO}_4)_2 \cdot 12\text{H}_2\text{O}$ .  
1,10-Phenanthroline is added and the red color verifies the generation of  $\text{Fe}^{2+}$ .



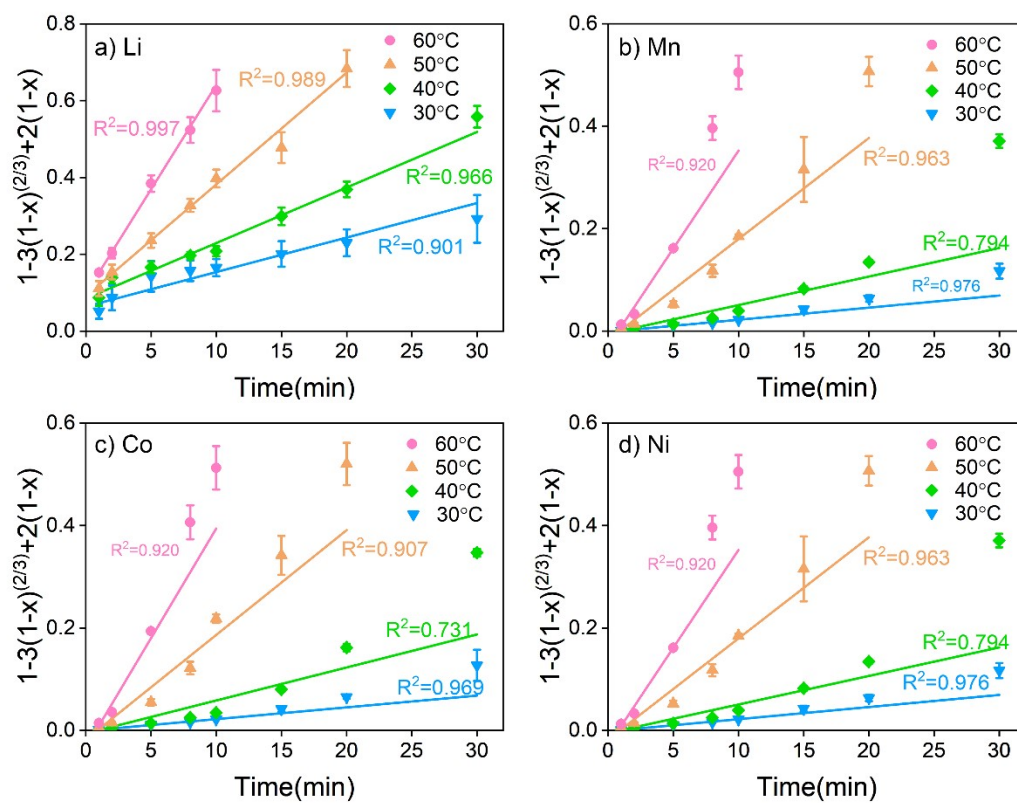

Fig. S8 Fitting results of a) Li, b) Mn, c) Co and d) Ni according to surface diffusion model.

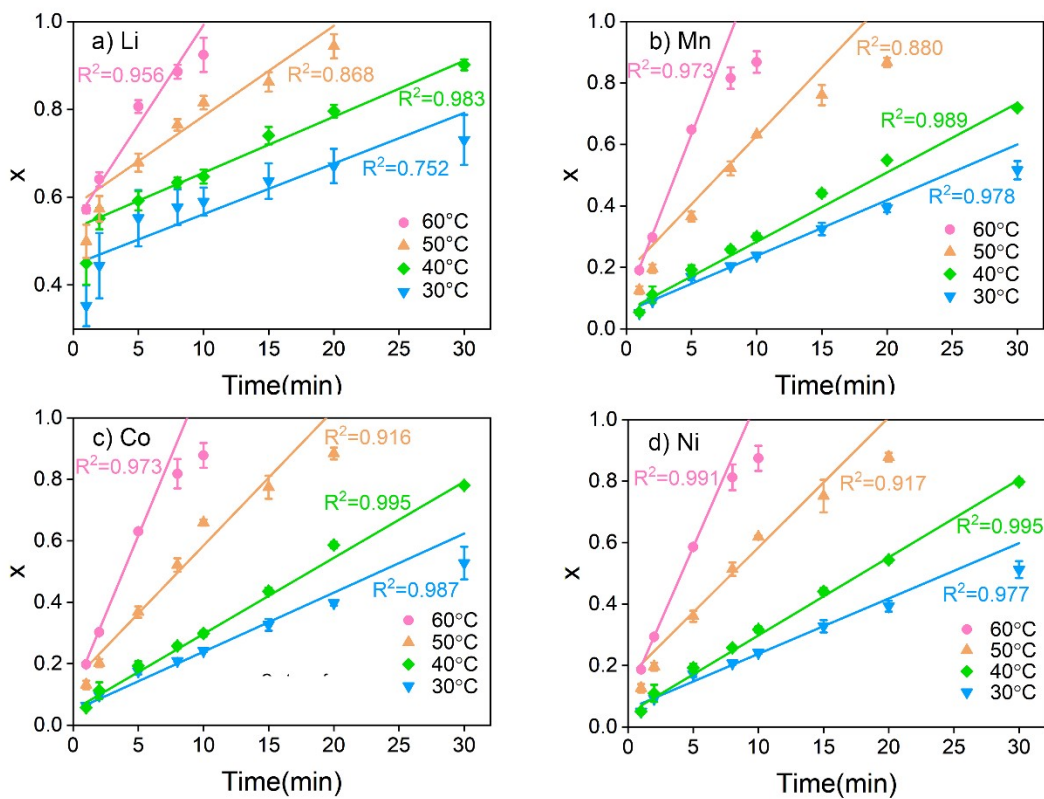

Fig. S9 Fitting results of a) Li, b) Mn, c) Co and d) Ni according to mass transfer model.

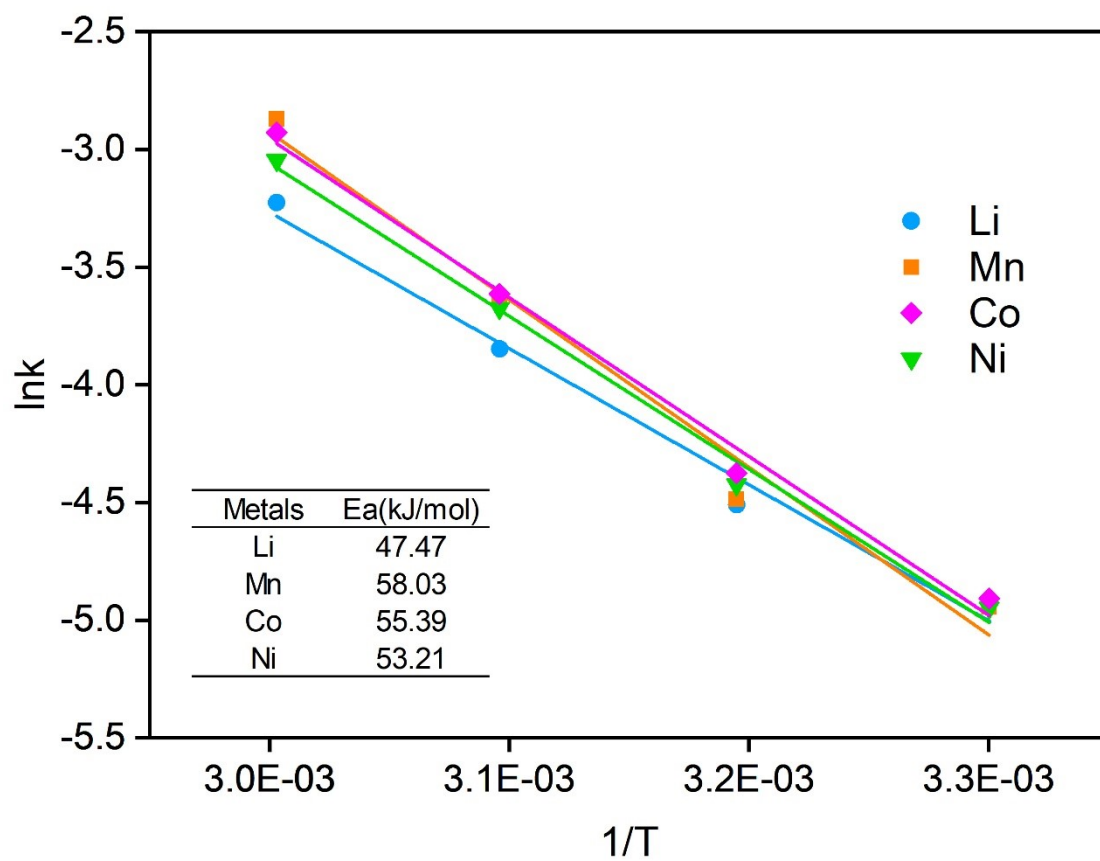

Fig. S10 Activation energy calculation of Li, Mn, Co and Ni according to Arrhenius equation in the range of 30-60°C

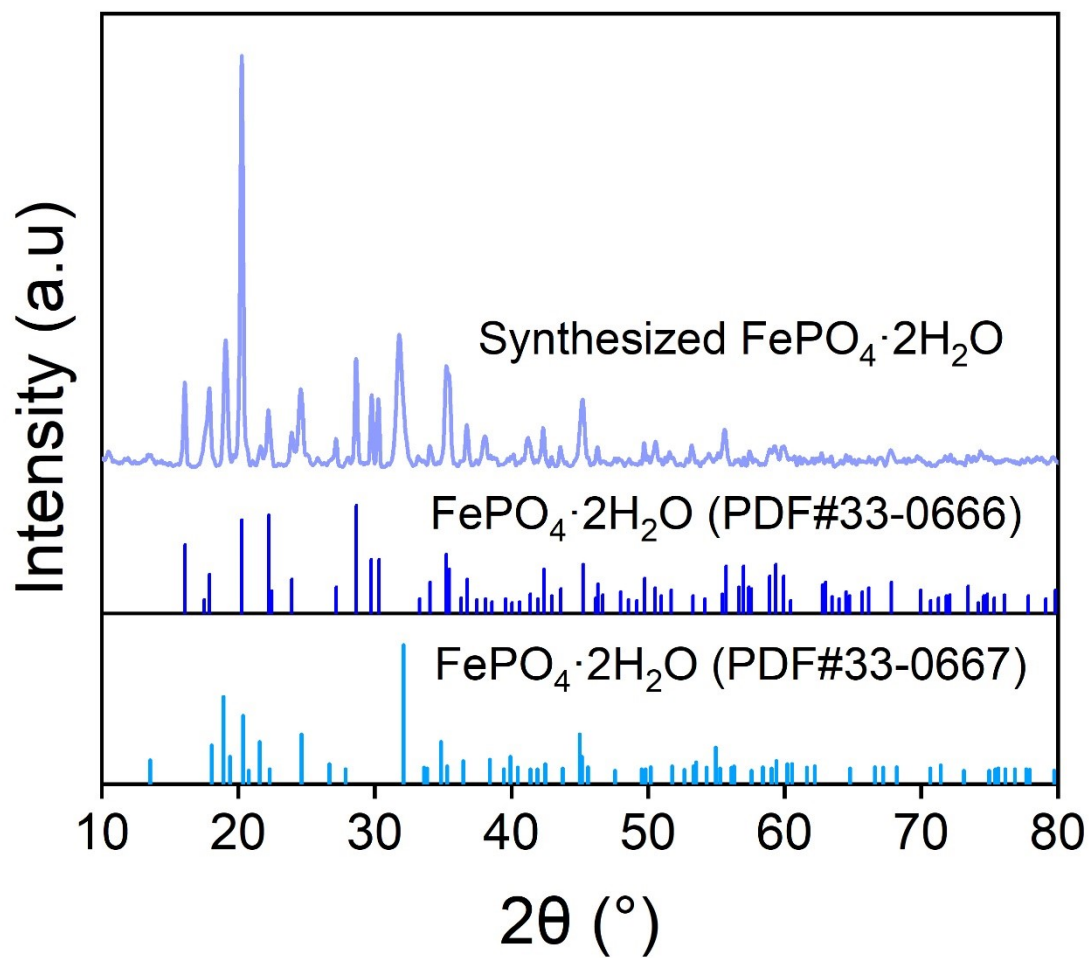

Fig. S11 XRD pattern of recovered FePO<sub>4</sub>·2H<sub>2</sub>O after washing the residue with H<sub>3</sub>PO<sub>4</sub>+NH<sub>4</sub>H<sub>2</sub>PO<sub>4</sub> at PH=2-2.5

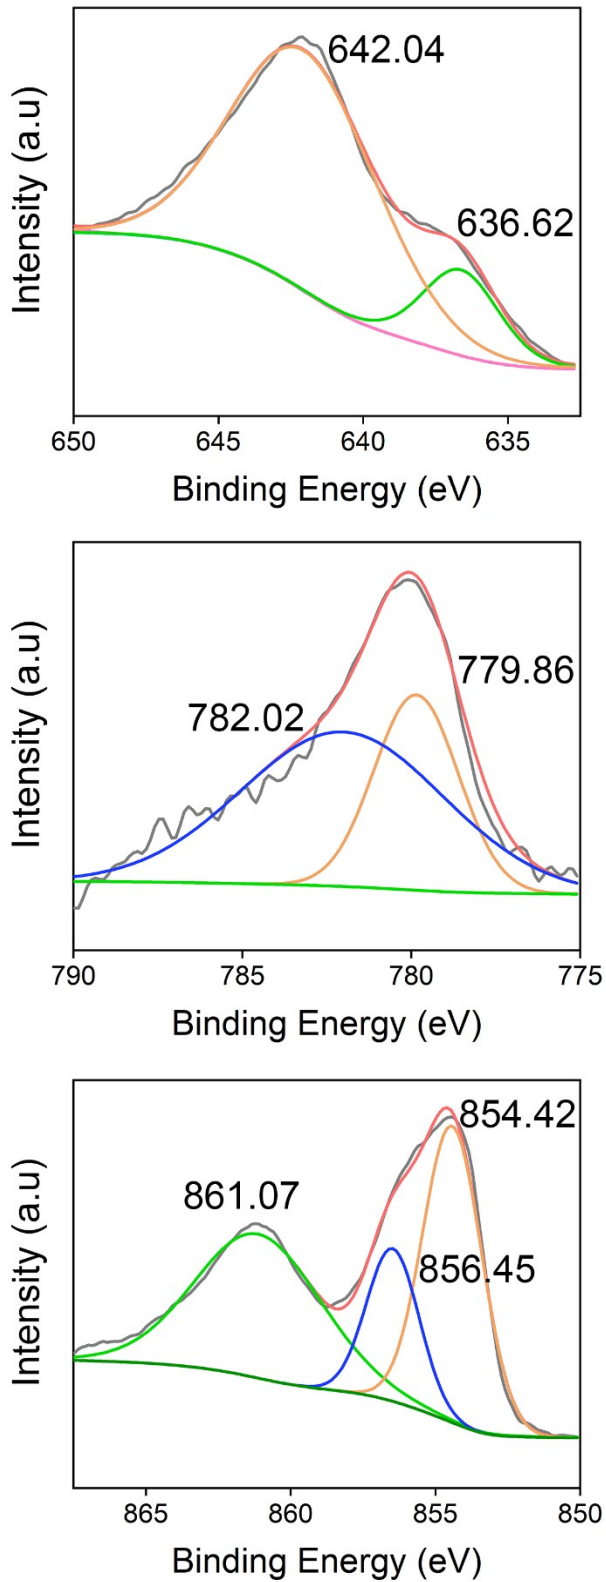

Fig. S12 XPS analysis of recovered MnCoNi oxide after 900°C calcination
